# Supplementary material
Source: ML conference proceedings conference paper supplement (https://openreview.net/forum?id=E18kRXTGmV)
Supplement: supplementary_material [file attachment]

---

# CVQA: Culturally-diverse Multilingual Visual Question Answering Benchmark Supplementary Material

---

David Romero\*\*, Chenyang Lyu\*\*, Haryo Akbarianto Wibowo\*, Teresa Lynn , Injy Hamed ,  
Aditya Nanda Kishore , Aishik Mandal , Alina Dragonetti , Artem Abzaliev ,  
Atnafu Lambebo Tonja , Bontu Fufa Balcha , Chenxi Whitehouse , Christian Salamea ,  
Dan John Velasco , David Ifeoluwa Adelani , David Le Meur , Emilio Villa-Cueva ,  
Fajri Koto , Fauzan Farooqui , Frederico Belcavello , Ganzorig Batnasan , Gisela Vallejo ,  
Grainne Caulfield , Guido Ivetta , Haiyue Song , Henok Biadgign Ademtew , Hernán Maina ,  
Holy Lovenia , Israel Abebe Azime , Jan Christian Blaise Cruz , Jay Gala , Jiahui Geng ,  
Jesus-German Ortiz-Barajas , Jinheon Baek , Jocelyn Dunstan , Laura Alonso Alemany ,  
Kumaranage Ravindu Yasas Nagasinghe , Luciana Benotti , Luis Fernando D’Haro ,  
Marcelo Viridiano , Marcos Estechea-Garitagoitia , Maria Camila Buitrago Cabrera ,  
Mario Rodríguez-Cantelar , Mélanie Jouitteau , Mihail Mihaylov , Naome Etori ,  
Mohamed Fazli Mohamed Imam , Muhammad Farid Adilazuarda , Munkhjargal Gochoo ,  
Munkh-Erdene Otgonbold , Olivier Niyomugisha , Paula Mónica Silva , Pranjali Chitale ,  
Raj Dabre , Rendi Chevi , Ruochen Zhang , Ryandito Diandaru , Samuel Cahyawijaya ,  
Santiago Góngora , Soyeong Jeong , Sukannya Purkayastha , Tatsuki Kuribayashi ,  
Teresa Clifford , Thanmay Jayakumar , Tiago Timponi Torrent , Toqeer Ehsan ,  
Vladimir Araujo , Yova Kementchedjhieva , Zara Burzo , Zheng Wei Lim , Zheng Xin Yong ,  
Oana Ignat , Joan Nwatu , Rada Mihalcea , Thamar Solorio\*, and Alham Fikri Aji\*

\*Core Authors (MBZUAI)  
www.cvqa-benchmark.org

1 In this Supplementary Material, we present the following items:

- 2 1. A datasheet for the dataset documentation of CVQA (Section 1).
- 3 2. The data access and maintenance plan (Section 2).
- 4 3. The Statement of responsibility (Section 3).
- 5 4. The annotation guideline provided to CVQA annotators (Section 4).
- 6 5. Annotation Platform (Section 5).
- 7 6. Additional Statistics (Section 6)

## 8 1 Datasheet for CVQA

9 For documenting CVQA, we use the datasheet for datasets introduced by Gebru et al. [1], which  
10 specify the motivation, composition, collection process, preprocessing, uses and distribution of a  
11 dataset. We follow and provide this datasheet for CVQA below:

### 12 Motivation

13

---

\*Equal Contribution

14 **Q1. For what purpose was this dataset created?** *Was there a specific task in mind?*  
15 *Was there a specific gap that needed to be filled? Please provide a description.*

16 We aim to address the limitations of current Visual Question Answering (VQA) datasets, which  
17 predominantly focus on English and Western-centric images. These datasets lack diversity, especially  
18 in low-resource languages and culturally varied images. To overcome these issues, we introduce  
19 CVQA, a new benchmark designed to include culturally-driven images and questions from 28  
20 countries covering 26 languages and 11 scripts. This benchmark aims to enhance the evaluation of  
21 multimodal AI models, encouraging the development of models with better cultural awareness and  
22 linguistic diversity.

23 **Q2. Who created the dataset (e.g., which team, research group) and on behalf of which entity**  
24 **(e.g., company, institution, organization)?**

25 CVQA is a collaborative movement involving many people from different institutions and communi-  
26 ties. The CVQA is led by a team of researchers from MBZUAI.

27 **Q3. Who funded the creation of the dataset?** *If there is an associated grant, please provide the*  
28 *name of the grantor and the grant name and number.*

29 No grant, all expenses were funded by the MBZUAI's faculty startup fund.

30 **Q4. Any other comments?**

31 No.

## 32 **Composition**

33

34 **Q5. What do the instances that comprise the dataset represent (e.g., documents, photos, people,**  
35 **countries)?** *Are there multiple types of instances (e.g., movies, users, and ratings; people and*  
36 *interactions between them; nodes and edges)? Please provide a description.*

37 We provide a test set that contains instances of image-question pairs. Specifically, each instance is a  
38 dictionary that contains: image, ID, Subset, Question, Translated Question, Options,  
39 Translated Options, Label, Category, Image Type, Image Source, License. We  
40 provide a more detailed description of each field and an example in the README of <https://huggingface.co/datasets/afaji/cvqa>.  
41

42 **Q6. How many instances are there in total (of each type, if appropriate)?**

43 CVQA contains a test-split of 9044 instances of image-question pairs.

44 **Q7. Does the dataset contain all possible instances or is it a sample (not necessarily random)**  
45 **of instances from a larger set?** *If the dataset is a sample, then what is the larger set? Is the*  
46 *sample representative of the larger set (e.g., geographic coverage)? If so, please describe how*  
47 *this representativeness was validated/verified. If it is not representative of the larger set, please*  
48 *describe why not (e.g., to cover a more diverse range of instances, because instances were withheld*  
49 *or unavailable).*

50 Yes, it contains all instances.

51 **Q8. What data does each instance consist of?** *“Raw” data (e.g., unprocessed text or images) or*  
52 *features? In either case, please provide a description.*

53 We provide raw annotations, where each instance consists of an image, a question and four answer  
54 candidates - of which only one is correct.

55 **Q9. Is there a label or target associated with each instance?** *If so, please provide a description.*

56 Yes, we provide four answer candidates for each question; among each set of four, we have labelled  
57 one as correct.

58 **Q10. Is any information missing from individual instances?** *If so, please provide a description,*  
59 *explaining why this information is missing (e.g., because it was unavailable). This does not include*  
60 *intentionally removed information, but might include, e.g., redacted text.*

61 No.



62 **Q11. Are relationships between individual instances made explicit (e.g., users' movie ratings,**  
63 **social network links)?** *If so, please describe how these relationships are made explicit.*

64 Some of the images are associated with more than one question (max three).

65 **Q12. Are there recommended data splits (e.g., training, development/validation, testing)?** *If so,*  
66 *please provide a description of these splits, explaining the rationale behind them.*

67 All data is for test purposes.

68 **Q13. Are there any errors, sources of noise, or redundancies in the dataset?** *If so, please provide*  
69 *a description.*

70 The data is human-written so it is bound to errors such as typos or grammatical errors. However, we  
71 argue that these errors are naturally made and (in very small amounts) are good for benchmarking the  
72 model's robustness, as the purpose of creating the dataset.

73 **Q14. Is the dataset self-contained, or does it link to or otherwise rely on external resources**  
74 **(e.g., websites, tweets, other datasets)?** *If it links to or relies on external resources, a) are there*  
75 *guarantees that they will exist, and remain constant, over time; b) are there official archival versions*  
76 *of the complete dataset (i.e., including the external resources as they existed at the time the dataset*  
77 *was created); c) are there any restrictions (e.g., licenses, fees) associated with any of the external*  
78 *resources that might apply to a future user? Please provide descriptions of all external resources and*  
79 *any restrictions associated with them, as well as links or other access points, as appropriate.*

80 It is self-contained in <https://huggingface.co/datasets/afaji/cvqa>

81 **Q15. Does the dataset contain data that might be considered confidential (e.g., data that is**  
82 **protected by legal privilege or by doctor-patient confidentiality, data that includes the content**  
83 **of individuals' non-public communications)?** *If so, please provide a description.*

84 No.

85 **Q16. Does the dataset contain data that, if viewed directly, might be offensive, insulting,**  
86 **threatening, or might otherwise cause anxiety?** *If so, please describe why.*

87 No.

88 **Q17. Does the dataset relate to people?** *If not, you may skip the remaining questions in this section.*

89 No.

90 **Q18. Does the dataset identify any subpopulations (e.g., by age, gender)?**

91 By country.

92 **Q19. Is it possible to identify individuals (i.e., one or more natural persons), either directly or**  
93 **indirectly (i.e., in combination with other data) from the dataset?** *If so, please describe how.*

94 No.

95 **Q20. Does the dataset contain data that might be considered sensitive in any way (e.g., data**  
96 **that reveals racial or ethnic origins, sexual orientations, religious beliefs, political opinions or**  
97 **union memberships, or locations; financial or health data; biometric or genetic data; forms**  
98 **of government identification, such as social security numbers; criminal history)?** *If so, please*  
99 *provide a description.*

100 Yes - ethnic origins. The purpose of this dataset is to capture culture in the images. However, as  
101 public faces are blurred/ unrecognisable, this feature does not pose any risk.

102 **Q21. Any other comments?**

103 No.

#### 104 **Collection Process**

105

106 **Q22. How was the data associated with each instance acquired?** *Was the data directly*  
107 *observable (e.g., raw text, movie ratings), reported by subjects (e.g., survey responses), or indirectly*  
108 *inferred/derived from other data (e.g., part-of-speech tags, model-based guesses for age or*  
109 *language)? If data was reported by subjects or indirectly inferred/derived from other data, was the*

110 *data validated/verified? If so, please describe how.*  
111 The image is obtained from either web or self-made images, we selected web images with Creative  
112 Commons license. Questions and options are written by annotators.

113 **Q23. What mechanisms or procedures were used to collect the data (e.g., hardware apparatus or**  
114 **sensor, manual human curation, software program, software API)? How were these mechanisms**  
115 **or procedures validated?**  
116 Manual human curation. See Section 5 and 4 for details about our annotation platform and guideline.  
117 For more information, please refer to our paper.

118 **Q24. If the dataset is a sample from a larger set, what was the sampling strategy (e.g., determin-**  
119 **istic, probabilistic with specific sampling probabilities)?**  
120 N/A

121 **Q25. Who was involved in the data collection process (e.g., students, crowdworkers, contractors)**  
122 **and how were they compensated (e.g., how much were crowdworkers paid)?**  
123 Those involved in the data collection process have been named as co-authors.

124 **Q26. Over what timeframe was the data collected? Does this timeframe match the creation**  
125 **timeframe of the data associated with the instances (e.g., recent crawl of old news articles)? If**  
126 **not, please describe the timeframe in which the data associated with the instances was created.**  
127 The data was collected from 2023 to 2024.

128 **Q27. Were any ethical review processes conducted (e.g., by an institutional review board)? If so,**  
129 **please provide a description of these review processes, including the outcomes, as well as a link or**  
130 **other access point to any supporting documentation.**  
131 Ethical Review was not required for this dataset collection.

132 **Q28. Does the dataset relate to people? If not, you may skip the remaining questions in this section.**  
133 No, Annotators were asked to provide data about their country's culture but not specific to any  
134 individual or groups of people.

135 **Q29. Did you collect the data from the individuals in question directly, or obtain it via third**  
136 **parties or other sources (e.g., websites)?**  
137 N/A.

138 **Q30. Were the individuals in question notified about the data collection? If so, please describe**  
139 **(or show with screenshots or other information) how notice was provided, and provide a link or other**  
140 **access point to, or otherwise reproduce, the exact language of the notification itself.**  
141 N/A.

142 **Q31. Did the individuals in question consent to the collection and use of their data? If so, please**  
143 **describe (or show with screenshots or other information) how consent was requested and provided,**  
144 **and provide a link or other access point to, or otherwise reproduce, the exact language to which the**  
145 **individuals consented.**  
146 N/A.

147 **Q32. If consent was obtained, were the consenting individuals provided with a mechanism to**  
148 **revoke their consent in the future or for certain uses? If so, please provide a description, as well**  
149 **as a link or other access point to the mechanism (if appropriate).**  
150 N/A.

151 **Q33. Has an analysis of the potential impact of the dataset and its use on data subjects**  
152 **(e.g., a data protection impact analysis) been conducted? If so, please provide a description**  
153 **of this analysis, including the outcomes, as well as a link or other access point to any supporting**  
154 **documentation.**  
155 N/A.

156 **Q34. Any other comments?**  
157 No.

158 **Preprocessing, Cleaning and/or Labeling**

159

160 **Q35. Was any preprocessing/cleaning/labeling of the data done (e.g., discretization or**  
161 **bucketing, tokenization, part-of-speech tagging, SIFT feature extraction, removal of instances,**  
162 **processing of missing values)? If so, please provide a description. If not, you may skip the**  
163 **remainder of the questions in this section.**

164 Yes, we removed all image metadata, automatically blurred faces and text that would reveal the  
165 answer, and finally removed images that had invalid licenses.

166 **Q36. Was the “raw” data saved in addition to the preprocessed/cleaned/labeled data (e.g., to**  
167 **support unanticipated future uses)? If so, please provide a link or other access point to the “raw”**  
168 **data.**

169 No.

170 **Q37. Is the software used to preprocess/clean/label the instances available? If so, please provide**  
171 **a link or other access point.**

172 We used a standard Python code to clean and preprocess the final instances of CVQA. During the  
173 data collection process we allowed the annotators to use “PicdeFacer”, a tool that can be used for  
174 blurring faces or information: <https://picdefacer.com/en/>.

175 **Q38. Any other comments?**

176 No.

177 **Uses**

178

179 **Q39. Has the dataset been used for any tasks already? If so, please provide a descrip-**  
180 **tion**

181 Our dataset have not been used for other tasks yet. We only use it in our paper to benchmark various  
182 models.

183 **Q40. Is there a repository that links to any or all papers or systems that use the dataset? If so,**  
184 **please provide a link or other access point.**

185 No.

186 **Q41. What (other) tasks could the dataset be used for?**

187 Primarily for benchmarking Cultural multilingual visual QA, but this dataset can potentially be used  
188 for Machine Translation and language learning game (CALL).

189 **Q42. Is there anything about the composition of the dataset or the way it was collected and**  
190 **preprocessed/cleaned/labeled that might impact future uses? For example, is there anything that**  
191 **a future user might need to know to avoid uses that could result in unfair treatment of individuals or**  
192 **groups (e.g., stereotyping, quality of service issues) or other undesirable harms (e.g., financial harms,**  
193 **legal risks) If so, please provide a description. Is there anything a future user could do to mitigate**  
194 **these undesirable harms?**

195 No.

196 **Q43. Are there tasks for which the dataset should not be used? If so, please provide a description**

197 No.

198 **Q44. Any other comments?**

199 No.

200 **Distribution**

201

202 **Q45. Will the dataset be distributed to third parties outside of the entity (e.g., com-**  
203 **pany, institution, organization) on behalf of which the dataset was created? If so, please provide**  
204 **a description.**

205 Yes, the data has been publicly released.

206 **Q46. How will the dataset be distributed (e.g., tarball on website, API, GitHub)? Does the**  
207 *dataset have a digital object identifier (DOI)?*

208 The data is available on Huggingface at: <https://huggingface.co/datasets/afaji/cvqa>.

209 **Q47. When will the dataset be distributed?**

210 CVQA is already available from June 2024 and onward.

211 **Q48. Will the dataset be distributed under a copyright or other intellectual property (IP) license,**  
212 **and/or under applicable terms of use (ToU)? If so, please describe this license and/or ToU, and**  
213 *provide a link or other access point to, or otherwise reproduce, any relevant licensing terms or ToU,*  
214 *as well as any fees associated with these restrictions.*

215 Note that each instance has its own license. All data is free to use for research purposes, but not  
216 every entry is permissible for commercial use.

217 **Q49. Have any third parties imposed IP-based or other restrictions on the data associated with**  
218 **the instances? If so, please describe these restrictions, and provide a link or other access point**  
219 *to, or otherwise reproduce, any relevant licensing terms, as well as any fees associated with these*  
220 *restrictions.*

221 Yes, some images on Flickr, are under copyright. We advised annotators to only select those  
222 available for non-commercial use: [https://creativecommons.org/licenses/by-nc-nd/4.0/](https://creativecommons.org/licenses/by-nc-nd/4.0/deed.en)  
223 [deed.en](https://creativecommons.org/licenses/by-nc-nd/4.0/deed.en). We also automatically remove entries that do not conform to the copyright requirement.

224 **Q50. Do any export controls or other regulatory restrictions apply to the dataset or to individual**  
225 **instances? If so, please describe these restrictions, and provide a link or other access point to, or**  
226 *otherwise reproduce, any supporting documentation.*

227 No.

228 **Q51. Any other comments?**

229 No.

## 230 **Maintenance**

231

232 **Q52. Who will be supporting/hosting/maintaining the dataset?**

233 CVQA team at MBZUAI.

234 **Q53. How can the owner/curator/manager of the dataset be contacted (e.g., email address)?**

235 You can contact the main team via email or through starting a new discussion on the CVQA Hugging  
236 Face page.

237 **Q54. Is there an erratum? If so, please provide a link or other access point**

238 N/A.

239 **Q55. Will the dataset be updated (e.g., to correct labeling errors, add new instances, delete**  
240 **instances)? If so, please describe how often, by whom, and how updates will be communicated to**  
241 *users (e.g., mailing list, GitHub)?*

242 Yes, updates will be made on Huggingface once we have more data (e.g. new country-language  
243 pairs) or there are reported errors in the data.

244 **Q56. If the dataset relates to people, are there applicable limits on the retention of the data**  
245 **associated with the instances (e.g., were individuals in question told that their data would be**  
246 **retained for a fixed period of time and then deleted)? If so, please describe these limits and explain**  
247 *how they will be enforced.*

248 N/A.

249 **Q57. Will older versions of the dataset continue to be supported/hosted/maintained? If so,**  
250 *please describe how. If not, please describe how its obsolescence will be communicated to users.*

251 N/A.

252 **Q58. If others want to extend/augment/build on/contribute to the dataset, is there a mechanism**  
253 **for them to do so? If so, please provide a description. Will these contributions be validated/verified?**

254 *If so, please describe how. If not, why not? Is there a process for communicating/distributing these*  
255 *contributions to other users? If so, please provide a description.*

256 Yes, it will be conducted through communications with CVQA team.

257 **Q59. Any other comments?**

258 No.

## 259 **2 Data Access and Maintenance Plan**

260 We publicly released CVQA, and it is available to download from Hugging Face: <https://huggingface.co/datasets/afaji/cvqa>. To assess model performance, we also created a  
261 leaderboard in eval.ai platform: [https://eval.ai/web/challenges/challenge-page/2305/](https://eval.ai/web/challenges/challenge-page/2305/overview)  
262 overview. Detailed information is provided in [www.cvqa-benchmark.org](http://www.cvqa-benchmark.org). We, the authors, will be  
263 responsible for handling CVQA issues and maintaining the data accordingly.  
264

## 265 **3 Statement of Responsibility**

266 We, the authors, bear all responsibilities in case of rights violations in CVQA. Please note that each  
267 image question in our dataset has its own distinct license. Although our data is free to use for research  
268 purposes, not all instances in CVQA are permissible for commercial use.

# Multilingual Multimodal Visual Question Answering

## Benchmark: Annotation Guidelines

### Introduction

This document provides guidelines for annotating images and corresponding questions and answers in multiple languages to create a culturally diverse and linguistically comprehensive multimodal QA benchmark.

### Objective

To build a benchmark that represents a wide range of cultures and languages, to measure potential bias in visual AI models.

### Guidelines for Contributors

Each region and language (eg. Ecuador-Spanish) will be represented by **at most 3 annotators, in which 1 will be the team lead**. Each person is expected to provide at least 100 visual questions to be considered as a co-author. The team lead will still have to provide questions, the only difference is that the team lead is responsible to find and to organize more annotators and will manage to contact and brief that annotator, if needed.

### Image Selection:

- Contribute images that represent diverse cultural aspects that represent the specific cultural background you're contributing to. The image must fall into one of the categories below. **Pick one of the most relevant category (more later):**

#### Image Category \*

- |                                                              |                                                          |
|--------------------------------------------------------------|----------------------------------------------------------|
| <input type="checkbox"/> Vehicles and Transportation         | <input type="checkbox"/> Brands, products, and companies |
| <input type="checkbox"/> Objects, materials, clothing        | <input type="checkbox"/> Sports and recreation           |
| <input type="checkbox"/> Cooking and food                    | <input type="checkbox"/> Traditions, art, and history    |
| <input type="checkbox"/> Geography, buildings, and landmarks | <input type="checkbox"/> People and everyday life        |
| <input type="checkbox"/> Plants and animal                   | <input type="checkbox"/> Public Figure and pop culture   |
| <input type="checkbox"/> Other                               |                                                          |

- Images should be relevant to your culture/country.
- Ensure that **images are relevant to the questions being posed**. In other words, the image is **needed** to answer the question.
- If the image contains the answer's text, you can blur/crop the image so that the image does not contain the answer.

- Image source:
  - 1. Self/personal picture (**highly preferable**). You may ask your family/friend to donate their photos, if possible.
  - 2. We also accept external images from:
    - Flickr: <https://www.flickr.com/explore> (**please make sure the associated license to the image is Creative Commons**), this can be selected at the the top left of Flickr (“Any License”).
    - WikimediaCommons: [https://commons.wikimedia.org/wiki/Main\\_Page](https://commons.wikimedia.org/wiki/Main_Page) (**here you do not need to select any license for the images**),
    - Unsplash: <https://unsplash.com/> (**please make sure to search the image first and they select the license: Free**). More details (Tutorial) at the end of this document.
    - Dollar Street: <https://www.gapminder.org/dollar-street> (**here you do not need to select any license for the images**), this webpage has images only from some countries, please make sure to select your country to find images if applicable.

More detailed instructions for each web page are shown at the end of this document.

- If you use an external image, you’ll need to put the url of the original image.
  - The image must be reasonable quality (not pixelated or blurry, can be understandable). You can upload images of any ratio as long as it is not too tall or wide (e.g.: don’t submit panorama pictures).
  - Do not show personally identifiable information (PII) such as faces, car plates, house addresses. Faces of public figures or fictional characters are ok. Also, **please be sure to blur text in the image that will leak the answer.** “PicdeFacer” can be used for blurring: <https://picdefacer.com/en/>. Tutorial on using PicdeFacer is shown at the end of this document.

### Question and Answer Creation:

After finding the image, you must now formulate 1-3 questions + answers from that image. Specifically:

- The question must be answerable **only by looking at the image**.
- Ensure that the questions are culturally relevant and specific to the image content.
- Provide answers that are concise, accurate, and directly related to the question.
- You will also need to provide 1 correct option and 3 other incorrect options (distractors). For the distractors, choose options that are relevant, not obvious wrong answers.

- **The question must be answerable even without the multiple-choice.**  
Example of the invalid question: (“What song is not performed by this musician” – not answerable if you don’t know the choices)
- Make sure the questions are **written fluently in both the local language and English**. Use a grammar checker if needed i.e. if you are not fluent in English.
- Be mindful of cultural sensitivities and avoid stereotyping or misrepresenting cultural aspects.
- Ensure there are **variations on your question**. Identity questions are fine, eg “What is this”, or “where is this”. But additionally adding more complex/difficult questions would be great. For example, multi-hop reasoning, counting, referencing, or questions that require local commonsense knowledge to be answered.

### Category Definition

When selecting a category, pick one of the most relevant. Please follow the guideline:

- **Vehicles and Transportation:** Local public transport, local vehicles.
- **Objects, Materials, Clothing:** Questions about local/traditional clothes. Unique/local tools or items.
- **Cooking and Food:** Local dishes and food/drink. This category includes native fruits in the context of the image if that fruit is served as a food/drink.
- **Geography, Buildings, Landmarks:** Popular/common landmarks, local architecture/buildings. Local monuments.
- **Plants and Animals:** Plants and animals commonly found in the region.
- **Brands, Products, and Companies:** Questions about understanding local yet popular brands or companies. Even if the brand is about food/transportation, if the main focus of the question is the brand recognition itself, then it should be under this category.
- **Sports & Recreation:** Local sports and fun activities. Focuses on the activity itself rather than the location (in that case, it goes to the 'landmark' category).
- **Tradition, Art, History:** Local ceremonies/festivals/events, local dance/music, folklores. Historical artifacts.
- **People & Everyday Life:** Focuses on the people themselves: i.e., common habits/customs, common occupations and jobs, routine religious activities, everyday activities/routines.



- **Public Figures & Pop Culture:** Questions on the understanding of common public figures (e.g., politicians, artists, musicians, etc.). Common pop culture such as movies and games. If the category is still ambiguous to you, pick the one you think is the most appropriate.

### Examples

#### Examples that can be improved

|                                                                                    |                                                                                                                                                                                                                                                                                                                                                                                                                                                             |
|------------------------------------------------------------------------------------|-------------------------------------------------------------------------------------------------------------------------------------------------------------------------------------------------------------------------------------------------------------------------------------------------------------------------------------------------------------------------------------------------------------------------------------------------------------|
|   | <p><b>Make sure the image is needed to respond the question, example:</b></p> <ol style="list-style-type: none"> <li>1) ¿En qué mes se celebra esta fiesta?<br/>(In which month is this celebration held?)<br/><b>Correct</b></li> <li>2) ¿En qué mes se celebra la fiesta de la "Mama Negra"?<br/>(In which month is the celebration of the "Mama Negra" held?)<br/><b>Wrong</b>—As this question can be answered without looking at the image.</li> </ol> |
|   | <p><b>Make sure the question is not ambiguous:</b></p> <ol style="list-style-type: none"> <li>1) Where is this monument located?<br/><b>Wrong</b>—Not specific, the answer could be a city, country, province, etc.</li> <li>2) In which <b>city</b> is this monument located?<br/><b>Correct</b>—specifically asking about the city</li> </ol>                                                                                                             |
|  | <p><b>Make sure the question is not too vague:</b></p> <ol style="list-style-type: none"> <li>1) What is this?<br/><b>Question wording can be more specific</b></li> <li>2) What is the name of this vehicle?<br/><b>Correct</b>—specifically asking about the vehicle name.</li> </ol>                                                                                                                                                                     |

#### Acceptable examples

|                                                                                     |                                                                                                                                                                                                                                                                                                                                                                                                                                                                                                                                                                                                                                                                                                                                                                                                 |
|-------------------------------------------------------------------------------------|-------------------------------------------------------------------------------------------------------------------------------------------------------------------------------------------------------------------------------------------------------------------------------------------------------------------------------------------------------------------------------------------------------------------------------------------------------------------------------------------------------------------------------------------------------------------------------------------------------------------------------------------------------------------------------------------------------------------------------------------------------------------------------------------------|
|  | <p><b>Category: Tradition / Art / History – Spanish/Mexico</b></p> <p>¿Qué se muestra en la imagen? (What is shown in the image?)</p> <ol style="list-style-type: none"> <li>A. el calendario azteca/ piedra del sol (the aztec calendar/ aztec sun stone)</li> <li>B. una serpiente azteca (an aztec serpent)</li> <li>C. coatlicue (coaticue)</li> <li>D. tláloc (tlaloc)</li> </ol> <p>¿En dónde se exhibe esta pieza? (Where is this piece exhibited?)</p> <ol style="list-style-type: none"> <li>A. En el museo nacional de antropología (In the National Museum of Anthropology)</li> <li>B. en el castillo de Chapultepec (In the Chapultepec Castle)</li> <li>C. En el zócalo de la ciudad de Mexico (In the Mexico City zocalo)</li> <li>D. En Teotihuacan (In Teotihuacan)</li> </ol> |
|-------------------------------------------------------------------------------------|-------------------------------------------------------------------------------------------------------------------------------------------------------------------------------------------------------------------------------------------------------------------------------------------------------------------------------------------------------------------------------------------------------------------------------------------------------------------------------------------------------------------------------------------------------------------------------------------------------------------------------------------------------------------------------------------------------------------------------------------------------------------------------------------------|

|                                                                                     |                                                                                                                                                                                                                                                                                                                                                                                                                                                                                                                                                                                                                                                                                                                                                                                                                                          |
|-------------------------------------------------------------------------------------|------------------------------------------------------------------------------------------------------------------------------------------------------------------------------------------------------------------------------------------------------------------------------------------------------------------------------------------------------------------------------------------------------------------------------------------------------------------------------------------------------------------------------------------------------------------------------------------------------------------------------------------------------------------------------------------------------------------------------------------------------------------------------------------------------------------------------------------|
|    | <p><b>Category: Tradition/ Art / History – Igbo/Nigeria</b></p> <p>Kedụ mmemme ndị a na-eme?<br/>(Which ceremony are they doing?)</p> <p><b>A. Ị gba nkwy (Traditional marriage)</b><br/> <b>B. Ncheta Omumu (Birthday)</b><br/> <b>C. Emume cheifaincy (Chieftaincy ceremony)</b><br/> <b>D. Emume iri ji qhurụ (New yam festival)</b></p> <p>Kedụ ebe a na-eme mmemme a?<br/>(Where is this ceremony held?)</p> <p><b>A. Ulo nna nwunye (The home of the bride's father)</b><br/> <b>B. Ahia (The market)</b><br/> <b>C. Ulo nna di (The home of the groom's father)</b><br/> <b>D. Ulo nsọ (The church)</b></p>                                                                                                                                                                                                                       |
|    | <p><b>Category: Tradition/ Art / History – Indonesian/Indonesia</b></p> <p>Pada tahun berapakah foto ini diambil?<br/>(In what year is this photo taken?)</p> <p><b>A. 2015 (2015)</b><br/> <b>B. 2020 (2020)</b><br/> <b>C. 2023 (2023)</b><br/> <b>D. 2010 (2010)</b></p> <p>Apa nama pasukan yang ada di foto ini?<br/>(What is the name of the squad in this photo?)</p> <p><b>A. Paskibraka (Paskibraka)</b><br/> <b>B. Brimob (Brimob)</b><br/> <b>C. TNI (TNI)</b><br/> <b>D. ABRI (ABRI)</b></p> <p>Apa tugas utama pasukan ini?<br/>(What is the main purpose of this squad?)</p> <p><b>A. Mengibarkan bendera (Hoisting the flag)</b><br/> <b>B. Mengawal presiden (Escorting president)</b><br/> <b>C. Menjaga keamanan (Maintaining security)</b><br/> <b>D. Mengiringi pengantin (Accompanying the bride and groom)</b></p> |
|  | <p><b>Category: Tradition, Art, History – Sundanese/Indonesia</b></p> <p>Naon kagunaan ieu hiji alat?<br/>(What is the use of this tool?)</p> <p><b>A. Alat musik (Musical instrument)</b><br/> <b>B. Alat pertahanan diri (Self defence tool)</b><br/> <b>C. Jemuran (Clothes drying equipment)</b><br/> <b>D. Alat masak (Cooking tool)</b><br/>   -</p> <p>Ieu hiji alat teh asalna ti propinsi mana di Indonesia?<br/>(This tool comes from which province in Indonesia?)</p> <p><b>A. Jawa Barat (West Java)</b><br/> <b>B. Bali (Bali)</b></p>                                                                                                                                                                                                                                                                                     |

|                                                                                     |                                                                                                                                                                                                                                                                                                                                                                                                                                                                                                                                                                                                                                                                                                |
|-------------------------------------------------------------------------------------|------------------------------------------------------------------------------------------------------------------------------------------------------------------------------------------------------------------------------------------------------------------------------------------------------------------------------------------------------------------------------------------------------------------------------------------------------------------------------------------------------------------------------------------------------------------------------------------------------------------------------------------------------------------------------------------------|
|                                                                                     | <p>C. Bengkulu (Bengkulu)<br/>D. Sumatra Barat (West Sumatra)</p>                                                                                                                                                                                                                                                                                                                                                                                                                                                                                                                                                                                                                              |
|    | <p><b>Category: Plants and animals – Malay/Malaysia</b></p> <p>Apakah nama bunga dalam gambar ini?<br/>(What is the name of the flower in this picture?)</p> <p><b>A. Pakma (Rafflesia)</b><br/>B. Bunga raya (Hibiscus)<br/>C. Anggerik (Orchid)<br/>D. Bunga kertas (Bougainvillea)</p> <p>Di rantau Asia manakah bunga itu boleh ditemui?<br/>(In which region of Asia can the flower be found?)</p> <p><b>A. Asia Tenggara (Southeast Asia)</b><br/>B. Asia Timur (East Asia)<br/>C. Asia Selatan (South Asia)<br/>D. Asia Tengah (Central Asia)</p>                                                                                                                                       |
|    | <p><b>Category: People and everyday life - Javanese/Indonesia</b></p> <p>Opo arane wong seng nang tengah embong iki?<br/>(What is the term for the man in the middle of the road?)</p> <p><b>A. Polisi cepek (Polisi cepek)</b><br/>B. Tukang parkir (Parking assistance man)<br/>C. Mlijo (Grocery man)<br/>D. Tukang becak (Pedicap man)</p> <p>Opo seng dilakukno wong seng nang tengah dalam iku?<br/>(What does the man in the middle of the road do?)</p> <p><b>A. Ngatur prapatan (Managing the intersection)</b><br/>B. Njaluk donasi (Asking for donations)<br/>C. Ngawasi pelanggaran lalu lintas (Looking out for traffic violations)<br/>D. Nunjukno arah (Showing directions)</p> |
|  | <p><b>Category: People and everyday life – Malay/Malaysian</b></p> <p>Roh manakah yang disembah dengan altar ini?<br/>(Which deity is worshiped on this altar?)</p> <p><b>A. Datuk Gong (Na Tuk Kong)</b><br/>B. Buddha (Buddha)<br/>C. Brahma (Brahma)<br/>D. Vishnu (Vishnu)</p> <p>Apakah agama yang diamalkan oleh pengguna altar ini?<br/>(What religion do the users of these altars practice?)</p> <p><b>A. Taoism (Taoisme)</b><br/>B. Buddha (Buddhisme)<br/>C. Islam (Islam)<br/>D. Hindu (Hinduisme)</p>                                                                                                                                                                            |

|                                                                                    |                                                                                                                                                                                                                                                                                                                                                                                                                                                                                                                                                                                                                                                                                                                                                                                                                                                          |
|------------------------------------------------------------------------------------|----------------------------------------------------------------------------------------------------------------------------------------------------------------------------------------------------------------------------------------------------------------------------------------------------------------------------------------------------------------------------------------------------------------------------------------------------------------------------------------------------------------------------------------------------------------------------------------------------------------------------------------------------------------------------------------------------------------------------------------------------------------------------------------------------------------------------------------------------------|
|   | <p><b>Category: People and Everyday Life – Indonesian/Indonesia</b></p> <p>Apa yang orang-orang ini lakukan?<br/>(What are these people doing?)</p> <p><b>A. Berwudhu (Performing ablution)</b><br/> <b>B. Mandi (Taking a bath)</b><br/> <b>C. Yoga (Yoga)</b><br/> <b>D. Beribadah (Praying)</b></p> <p>Dimana biasanya orang-orang melakukan aktivitas di foto ini?<br/>(Where do people usually do the activity in this photo?)</p> <p><b>A. Masjid (Mosque)</b><br/> <b>B. Gereja (Church)</b><br/> <b>C. Pemandian umum (Public bath)</b><br/> <b>D. Gym (Gym)</b></p>                                                                                                                                                                                                                                                                             |
|  | <p><b>Category: Cooking and Food – Tagalog/Philippines</b></p> <p>Anong tawag sa kakanin na ito?<br/>(What is the name of this rice cake?)</p> <p><b>A. Puto Bumbong (Puto Bumbong)</b><br/> <b>B. Suman (Suman)</b><br/> <b>C. Kutsinta (Kutsinta)</b><br/> <b>D. Sapin-Sapin (Sapin-Sapin)</b></p> <p>Tuwing kailan ito madalas tinitinda sa Pilipinas?<br/>(When is this food usually sold in the Philippines?)</p> <p><b>A. Christmas Season (Christmas Season)</b><br/> <b>B. Independence Day (Independence Day)</b><br/> <b>C. Labor Day (Labor Day)</b><br/> <b>D. National Heroes Day (National Heroes Day)</b></p> <p>Ano tawag dun sa brown?<br/>(What do you call the brown object?)</p> <p><b>A. Muscovado (Muscovado)</b><br/> <b>B. Latik (Toasted coconut)</b><br/> <b>C. Chocolate (Chocolate)</b><br/> <b>D. Caramel (Caramel)</b></p> |



|                                                                                     |                                                                                                                                                                                                                                                                                                                                                                                                                                                                                                                                                                                                                                                                                                                                                                                                                       |
|-------------------------------------------------------------------------------------|-----------------------------------------------------------------------------------------------------------------------------------------------------------------------------------------------------------------------------------------------------------------------------------------------------------------------------------------------------------------------------------------------------------------------------------------------------------------------------------------------------------------------------------------------------------------------------------------------------------------------------------------------------------------------------------------------------------------------------------------------------------------------------------------------------------------------|
|    | <p><b>Category: Object, Clothing, and Material – Korean/South Korea</b></p> <p>이런 종류의 요리에 사용되는 그릇을 무엇이라고 부르나요?<br/>(What is this type of bowl called in cooking?)</p> <p>A. 돌솥 (Dolsot)<br/>B. 복주머니 (Bokjumeoni)<br/>C. 냄비 (Pot)<br/>D. 팬 (Pan)</p> <p>그릇의 재질은 무엇인가요?<br/>(What is the material of the bowl?)</p> <p>A. 돌 (Stone)<br/>B. 도자기 (Ceramic)<br/>C. 유리 (Glass)<br/>D. 스테인리스 스틸 (Stainless Steel)</p>                                                                                                                                                                                                                                                                                                                                                                                                        |
|    | <p><b>Category: Landmark and building - Spanish/Ecuador</b></p> <p>¿Cómo se llama este monumento ubicado en Quito?<br/>(What is the name of this monument located in Quito?)</p> <p>A. Virgen de El Panecillo (The Virgin of El Panecillo)<br/>B. Manto de María (Manto de María)<br/>C. Mitad del mundo (Middle of the world)<br/>D. Cristo de la concordia (Christ of peace)</p>                                                                                                                                                                                                                                                                                                                                                                                                                                    |
|  | <p><b>Category: Landmark and building - Irish/Ireland</b></p> <p>Cén cathair ina bhfuil na dealbha seo?<br/>(In which city are these statues?)</p> <p>A. Cathair Bhaile Átha Cliath (Dublin City)<br/>B. Páras (Paris)<br/>C. Cathair Corcaigh (Cork City)<br/>D. Beirlín (Berlin)</p> <p>Cén eachtra stairiúil atá léirithe sna dealbha seo?<br/>(What historical event is depicted in these statues?)</p> <p>A. An Ghorta Mhór (The Great Famine)<br/>B. Éirí Amach 1916 (The 1916 Rising)<br/>C. Teitheadh na n-Iarlaí (The flight of the Earls)<br/>D. Cogadh 1835 (The 1835 war)</p> <p>Cén abhainn atá le taobh na ndialbh seo?<br/>(What river is beside these statues?)</p> <p>A. An Life (The Liffey)<br/>B. An tSionann (The Shannon)<br/>C. Abhainn an Rí (King's River)<br/>D. An Thames (The Thames)</p> |

277 **5 Annotation Platform**

278 We use JotForm as our annotation platform. For question entry, contributors can upload and write  
 279 questions in both languages in the form. The interface can be seen in Figure 1. During validation,  
 280 contributors can see all the data submitted by other contributors (Figure 2) and select the entry to  
 281 see a detailed preview of the submission (Figure 3), here they can edit the data directly, provide  
 282 comments, or confirm the data by starring the entry.

Figure 1: Annotation interface for entering image and questions

|     | Submission Date | Submission ID       | Image Upload | Is t... | If this is your...     | If this is not your own i...                                                      |
|-----|-----------------|---------------------|--------------|---------|------------------------|-----------------------------------------------------------------------------------|
| 146 | Mar 18, 2024    | 5865939274273446442 |              | Yes     | Yes, people can use t  |                                                                                   |
| 147 | Mar 18, 2024    | 5865939274273557337 |              | No      |                        | <a href="https://www.flickr.com/photos/...">https://www.flickr.com/photos/...</a> |
| 148 | Mar 18, 2024    | 5865939274273646152 |              | No      |                        | <a href="https://commons.wikimedia.org...">https://commons.wikimedia.org...</a>   |
| 149 | Mar 18, 2024    | 5865939274273647849 |              |         |                        | <a href="https://commons.wikimedia.org...">https://commons.wikimedia.org...</a>   |
| 150 | Mar 18, 2024    | 5865939274273855904 |              |         | Yes, people can use t  |                                                                                   |
| 151 | Mar 18, 2024    | 5865939274273979270 |              |         | No, this image is rese |                                                                                   |
| 152 | Mar 18, 2024    | 5865939274274187387 |              |         | Yes, people can use t  |                                                                                   |
| 153 | Mar 18, 2024    | 5865939274274387192 |              | Yes     | Yes, people can use t  |                                                                                   |
| 154 | Mar 18, 2024    | 5865939274274408912 |              | No      |                        | <a href="https://flickr.com/photos/bona...">https://flickr.com/photos/bona...</a> |
| 155 | Mar 18, 2024    | 5865939274274558472 |              | Yes     | Yes, people can use t  |                                                                                   |
| 156 | Mar 18, 2024    | 5865939274274664373 |              | No      |                        | <a href="https://commons.wikimedia.org...">https://commons.wikimedia.org...</a>   |
| 157 | Mar 18, 2024    | 5865939274274801278 |              | No      |                        | <a href="https://flic.kr/p/5jEX4d">https://flic.kr/p/5jEX4d</a>                   |
| 158 | Mar 18, 2024    | 5865939274274878679 |              | Yes     | Yes, people can use t  |                                                                                   |

Figure 2: Annotation interface for validation. Contributors can comment, edit, and star the entries

283 **6 Additional Statistics**

284 **6.1 Most-Frequent Words in the Questions**

285 Figure 4 shows word clouds for the most frequent words in CVQA per category. We exclude  
 286 stopwords as well as ‘picture’, ‘photo’, and ‘image’ from the list, since most questions contain these  
 287 words. In this VQA context, we can treat them as stopwords.

### 3. Pretzel

Updated at May 21, 2024

Image Upload



Is the image self-made/yours?

**Yes**

If this is your own image, will you allow this image for commercial use?

**Yes, people can use this image for commercial**

If this is not your own image, enter the original image URL

Enter a text

Question Language

Minangkabau

Image Country Origin

Indonesia

Image Category

### 3. Pretzel

Updated at May 21, 2024

**Cooking and food**

Question 1 (in local language)

Apo namo jajanan pasa ko?

Translated Question 1 (in English)

What is the name of this traditional snack?

Q1: Correct answer (in local language)

Kue tambang

Q1: Correct answer (in English)

Tambang cake

Q1: Wrong option 1 (in local language)

Pretzel

Q1: Wrong option 1 (in English)

Pretzel

Q1: Wrong option 2 (in local language)

Onde-onde

Figure 3: During validation, contributors can preview the submission from other contributors

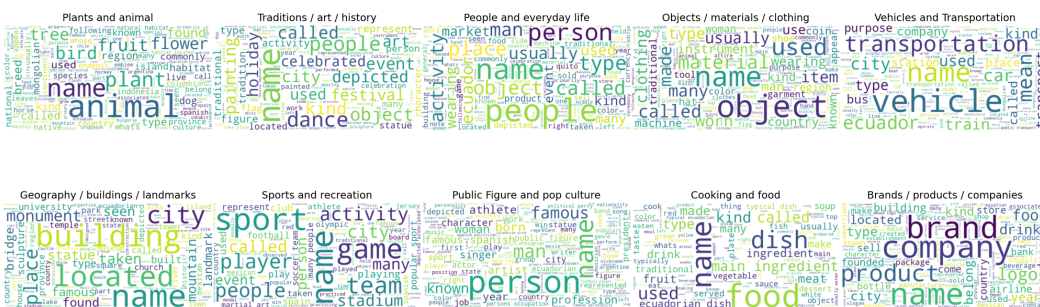

Figure 4: Word Cloud in CVQA per category

## 288 6.2 CVQA Annotator Demographic

289 Figure 5 illustrates the demographic statistics of the annotators, based on an anonymous questionnaire  
 290 we provided. At the time of writing, we have information for 36 out of 76 annotators. As such, this  
 291 breakdown is a rough representation of the annotation group.

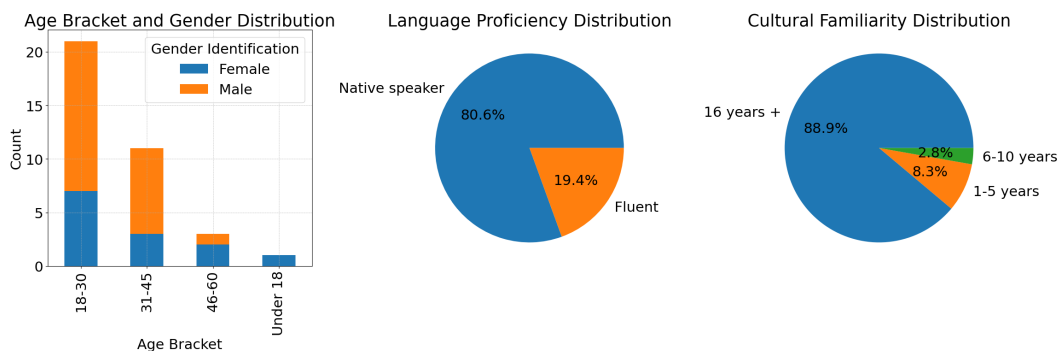

Figure 5: Annotator demographic statistics

## 292 6.3 Country-Language Pairs and Scripts

293 In Table 1, we provide information on the script used in each Country-Language pair.

| Country              | Language        | Script       |
|----------------------|-----------------|--------------|
| <i>Africa</i>        |                 |              |
| Egypt                | Egyptian Arabic | Arabic       |
| Ethiopia             | Amharic         | Amharic      |
| Ethiopia             | Oromo           | Latin        |
| Nigeria              | Igbo            | Latin        |
| <i>Asia</i>          |                 |              |
| China                | Chinese         | Chinese      |
| India                | Bengali         | Bengali      |
| India                | Tamil           | Tamil        |
| Indonesia            | Indonesian      | Latin        |
| Indonesia            | Javanese        | Latin        |
| Indonesia            | Minangkabau     | Latin        |
| Indonesia            | Sundanese       | Latin        |
| Japan                | Japanese        | Japanese     |
| South Korea          | Korean          | Hangul       |
| Malaysia             | Malay           | Latin        |
| Mongolia             | Mongolian       | Cyrillic     |
| Pakistan             | Urdu            | Perso-Arabic |
| Philippines          | Filipino        | Latin        |
| Singapore            | Chinese         | Chinese      |
| Sri Lanka            | Sinhala         | Sinhalese    |
| <i>Europe</i>        |                 |              |
| Bulgaria             | Bulgarian       | Cyrillic     |
| France               | Breton          | Latin        |
| Ireland              | Irish           | Latin        |
| Norway               | Norwegian       | Latin        |
| Romania              | Romanian        | Latin        |
| Russia               | Russian         | Cyrillic     |
| Spain                | Spanish         | Latin        |
| <i>Latin America</i> |                 |              |
| Argentina            | Spanish         | Latin        |
| Brazil               | Portuguese      | Latin        |
| Chile                | Spanish         | Latin        |
| Colombia             | Spanish         | Latin        |
| Ecuador              | Spanish         | Latin        |
| Mexico               | Spanish         | Latin        |
| Uruguay              | Spanish         | Latin        |

Table 1: The list of Country-Language pairs covered in CVQA and their corresponding scripts.

## 294 References

- 295 [1] T. Gebru, J. Morgenstern, B. Vecchione, J. W. Vaughan, H. Wallach, H. D. I. au2, and K. Crawford.  
296 Datasheets for datasets, 2021.
